# Supplementary material for: Inducible Prmt1 ablation in adult vascular smooth muscle leads to contractile dysfunction and aortic dissection
Source: PubMed Central journal article supplement (PMC8568946; doi:10.1038/s12276-021-00684-x), 2021-10-11
Supplement: 12276_2021_684_MOESM1_ESM.pdf [file 12276_2021_684_MOESM1_ESM.pdf]

## Supplementary Information

### Inducible Prmt1 ablation in adult vascular smooth muscle leads to contractile dysfunction and aortic dissection

Jung-Hoon Pyun<sup>1,2,#</sup>, Byeong-Yun Ahn<sup>1,2,#</sup>, Tuan Anh Voung<sup>3</sup>, Su Woo Kim<sup>1,2</sup>, Yunju Jo<sup>1</sup>, Jaehyung Jeon<sup>4</sup>, Seung Ho Baek<sup>4</sup>, Jaewon Kim<sup>4</sup>, Sungsu Park<sup>4,5</sup>, Gyu-Un Bae<sup>6</sup>, Jun-Hyuk Choi<sup>7</sup>, Jae-Ryong Kim<sup>8</sup>, Dongryeol Ryu<sup>1</sup>, Sang-Jin Lee<sup>3\*</sup>, Jong-Sun Kang<sup>1,2\*</sup>

<sup>1</sup>Department of Molecular Cell Biology, <sup>2</sup>Single Cell Network Research Center, Sungkyunkwan University, Suwon, South Korea. <sup>3</sup>Research Institute of Aging Related Diseases, AniMusCure Inc., Suwon, South Korea. <sup>4</sup>School of Mechanical Engineering and <sup>5</sup>Department of Global Biomedical Engineering, Sungkyunkwan University, Suwon, South Korea. <sup>6</sup>College of Pharmacy, Sookmyung Women's University, Seoul, South Korea. <sup>7</sup>Department of Pathology, College of Medicine, Yeungnam University, <sup>8</sup>Department of Biochemistry and Molecular Biology, Smart-aging Convergence Research Center, Yeungnam University College of Medicine, Daegu, South Korea

**\*Correspondences:** Sang-Jin Lee ([animus\\_sjlee@animuscure.com](mailto:animus_sjlee@animuscure.com)) & Jong-Sun Kang, ([kangj01@skku.edu](mailto:kangj01@skku.edu))

22 **Supplementary Figures**

23

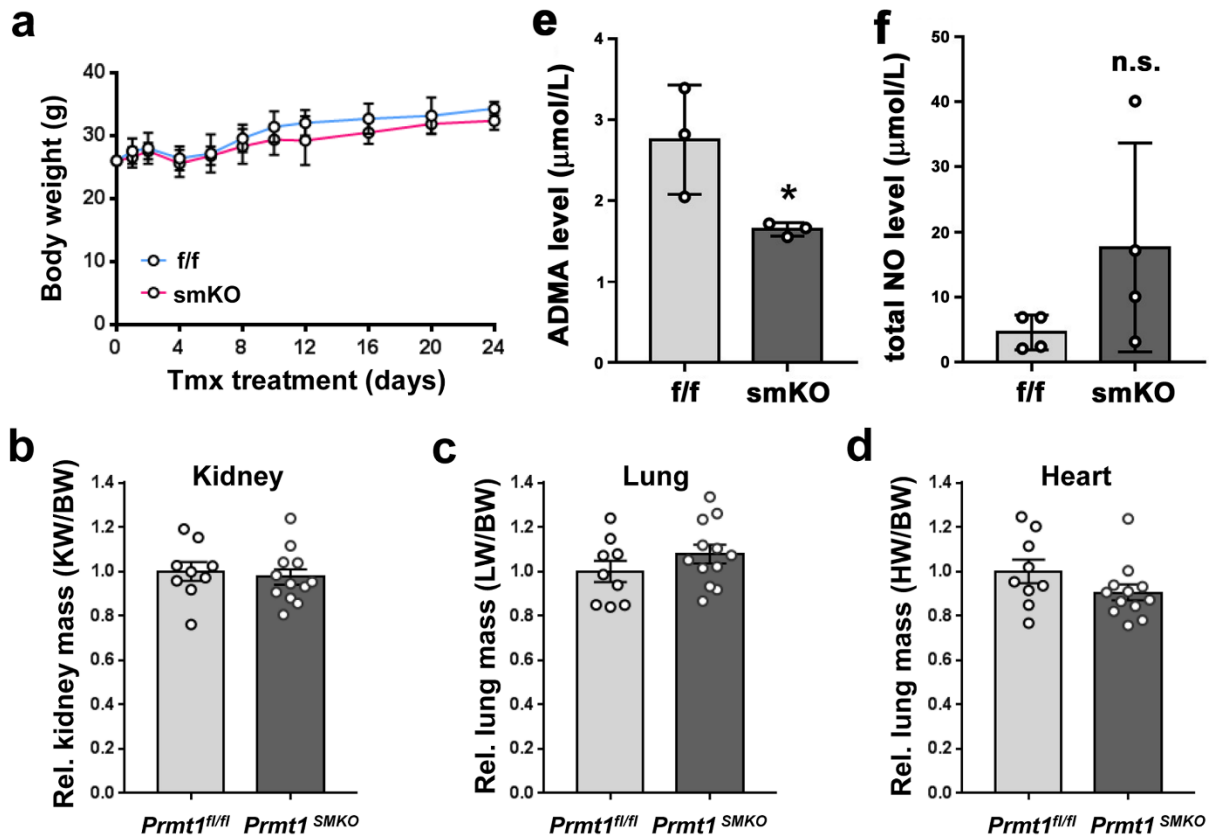

24 **Figure S1.**

25 **Supplementary Figure 1 Inducible Prmt1 ablation in adult VSMCs does not greatly alter**  
 26 **body and organ weights.** **a** Body weights of f/f and smKO mice during tamoxifen treatment  
 27 (n = 24). Data represent means ± SEM. \**P* < 0.05, Student's *t*-test. **b-d** Relative kidney (KW),  
 28 Lung (LW) and Heart weight (HW) / Body weight (BW) of f/f and smKO mice treated with  
 29 tmx for 20 weeks (n = 9-12). Data represent means ± SEM, Student's *t*-test. **e, f** Serum ADMA  
 30 and NO level from f/f and smKO mice treated with tmx for 20 weeks (n = 3 - 4). Data represent  
 31 means ± SEM, Student's *t*-test.

32

33

34

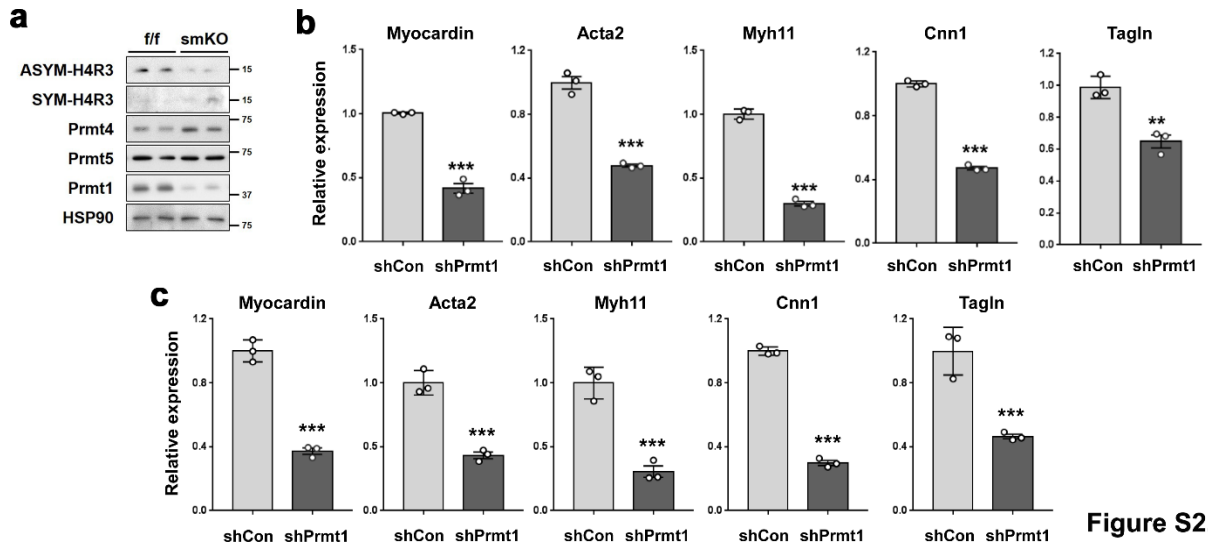

Figure S2.

35  
36  
37  
38  
39  
40  
41  
42  
43

**Supplementary Figure 2 Prmt1 depletion in VSMCs reduces Myocardin and its target contractile genes.** **a** Protein analysis for Prmt1, Prmt4 and Prmt5 expressions in aorta isolated from *f/f* and *smKO* mice. **b** qRT-PCR analysis of Myocardin and its target genes in RVSMC/shCon or RVSMC/shPrmt1 cells. Data represent means  $\pm$  SEM. \*\* $P < 0.01$ , \*\*\* $P < 0.001$ , Student's *t*-test. **c** RNA expression analysis for Myocardin and its target genes in Prmt1-depleted A7R5 cells. Data represent means  $\pm$  SEM. \*\*\* $P < 0.001$ , Student's *t*-test.

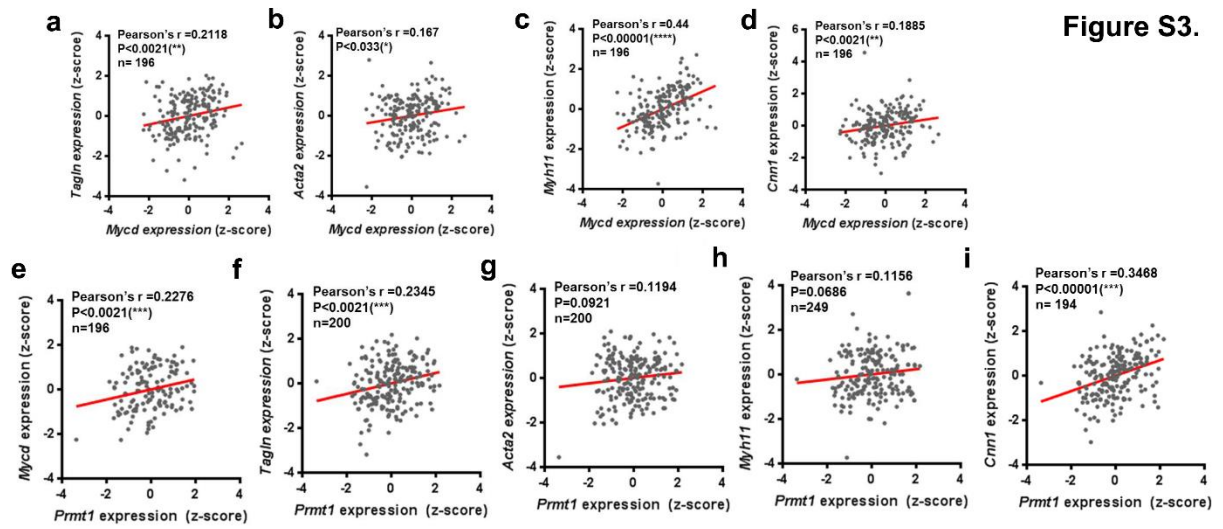

Figure S3.

44  
45  
46

**Supplementary Figure 3 A positive correlation of Prmt1, Myocardin and its target genes in VSMC transcriptomes from public database.** **a-d** Covariation analysis of public dataset

47 for the expression of Myocardin and its target contractile genes. Data represent means  $\pm$  SEM.  
48 \* $P < 0.033$ , \*\* $P < 0.0021$ , \*\*\*\* $P < 0.00001$ . Student's  $t$ -test. **e** Correlation analysis for  
49 Myocardin and Prmt1 expression. Data represent means  $\pm$  SEM. \*\*\* $P < 0.0021$ . Student's  $t$ -  
50 test. **f-i** Covariation study for the expression of Prmt1 and contractile genes. Data represent  
51 means  $\pm$  SEM. \*\*\* $P < 0.0021$ , \*\*\*\* $P < 0.00001$ . Student's  $t$ -test.

52

53

54 **Supplementary Table 1. Antibodies used in study.**

| Protein                              | Manufacturer | Catalog number |
|--------------------------------------|--------------|----------------|
| Prmt1                                | Millipore    | 07-404         |
| Prmt1                                | Abcam        | ab3768         |
| Alpha smooth muscle actin            | Abcam        | Ab5694         |
| Myosin heavy chain 11                | Abcam        | Ab53219        |
| Myocardin                            | Abcam        | ab107301       |
| Myocardin                            | biorbyt      | Orb1794        |
| Gapdh                                | Ab frontier  | LF-PA0018      |
| Histone H4 (asymmetric di methyl R3) | Abcam        | ab194683       |
| Histone H3 (Acetyl K9)               | Abcam        | ab4441         |
| Histone H3 (Tri-methyl K27)          | Abcam        | ab6002         |
| HSP90                                | Abcam        | ab13495        |

55

56 **Supplementary Table 2. Primer sequences used in study.**

|                               | <b>Forward(5'→3')</b>   | <b>Reverse(3'→5')</b>   |
|-------------------------------|-------------------------|-------------------------|
| Acta2 (rat)                   | CACGAAACCACCTATAACAGCA  | GAATATTTGCGTTCTGGAGGAG  |
| Myosin heavy chain 11 (rat)   | GAAAGGAAACACCAAGGTCAAG  | CTCACTGCGAAGTTTCTTG TG  |
| Calponin1 (rat)               | ATCATTGGCCTACAGATGGGC   | AGCGTGTCACAGTGTTCAT     |
| Tagln (rat)                   | AAGAATGGCGTGATTCTGAGC   | CTGCCTTCAAGAATTGAGCC    |
| Acta2 (mouse)                 | GCTTCGCTGGTGATGATGCTC   | AGTTGGTGATGATGCCGTGTTCC |
| Myosin heavy chain 11 (mouse) | TGCCGACACCGCCTACAGAAG   | TTTCCAGCTCCCCCGTGAT     |
| Calponin1 (mouse)             | GGACCAGGCGACCATCAG      | TAGGCAGAGTTGTAGTAGTTGTG |
| Tagln (mouse)                 | TGAGCCAAGCAGACTTCCAT    | TGTTGAGGCAGAGAAGGCTTG   |
| Myocardin (rat)               | CAAGGGTGTGCACAGATGACT   | ATGATCTTCCCTGGCATCCG    |
| Myocardin (mouse)             | AGTTTTCTGGGGACACTGGC    | GCCGTAAGTGTAAAGACTGATCG |
| Gapdh (mouse)                 | CAGTGCCAGCCTCGTCCCGTAGA | CTGCAAATGGCAGCCCTGGTGAC |
| Gapdh (rat)                   | GACATGCCGCCTGGAGAAAC    | AGCCCAGGATGCCCTTTAGT    |
| Myocardin (chip)              | GCAAAGAGTTAAGAGCCTGCT   | CCAGGAGTGTGATGGTGAGTC   |
| SRF (chip)                    | GCGAGTTCGGTATGTCTATGCAA | CCCAGCTTGGCTCGGTAACAT   |

57

58
